# Supplementary material for: Study of the Geometric Structures, Electronic and Magnetic Properties of Aluminium-Antimony Alloy Clusters
Source: publisher site journal article supplement (doi:10.1515/zna-2018-0345), 2018-11-16
Supplement: Supplementary file 1 [file Supplementary materials.doc]

**Supplementary materials**

**Study of the geometric structures, electronic and magnetic properties of** **aluminum-antimony alloy clusters**

Ai-Jie Mao*, Xiao-Yu Kuang, Hao Cheng, Li-Huan Zhang, Xiao-Rong Cheng

Institute of Atomic and Molecular Physics, Sichuan University, Chengdu 610065, China

*Correspondence

author. E-mail: scu_mij@126.com


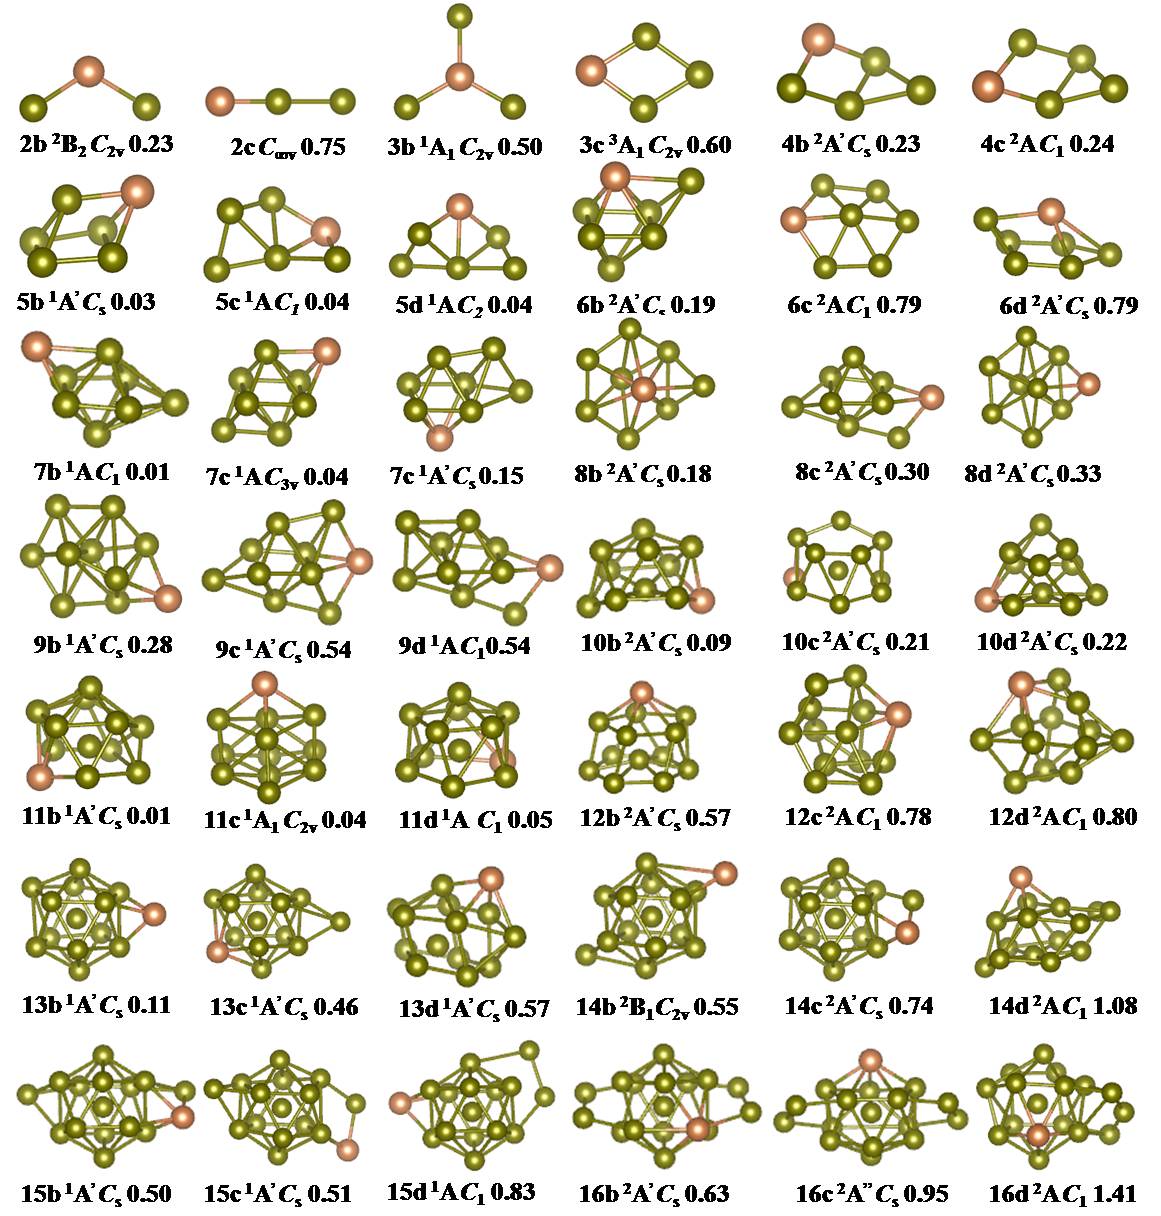


Fig. S1 The metastable isomers of AlnSb( n=1-16) clusters, together with point symmetry and relative energies.

**
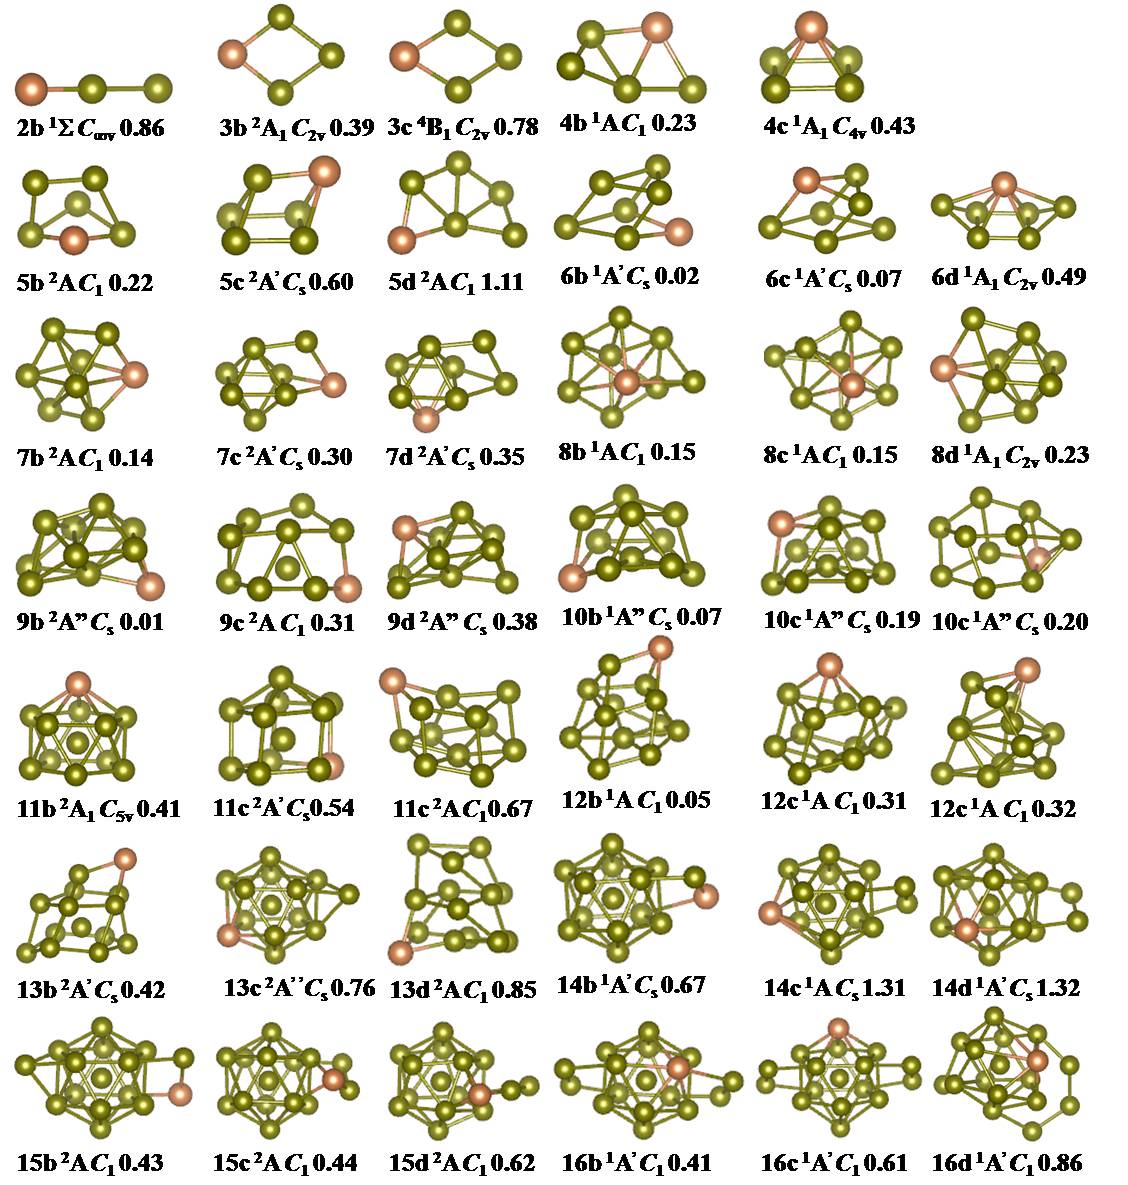
**

**Fig. S2 The metastable isomers of AlnSb ( n=1-16) clusters, together with point symmetry and relative energies.**

**
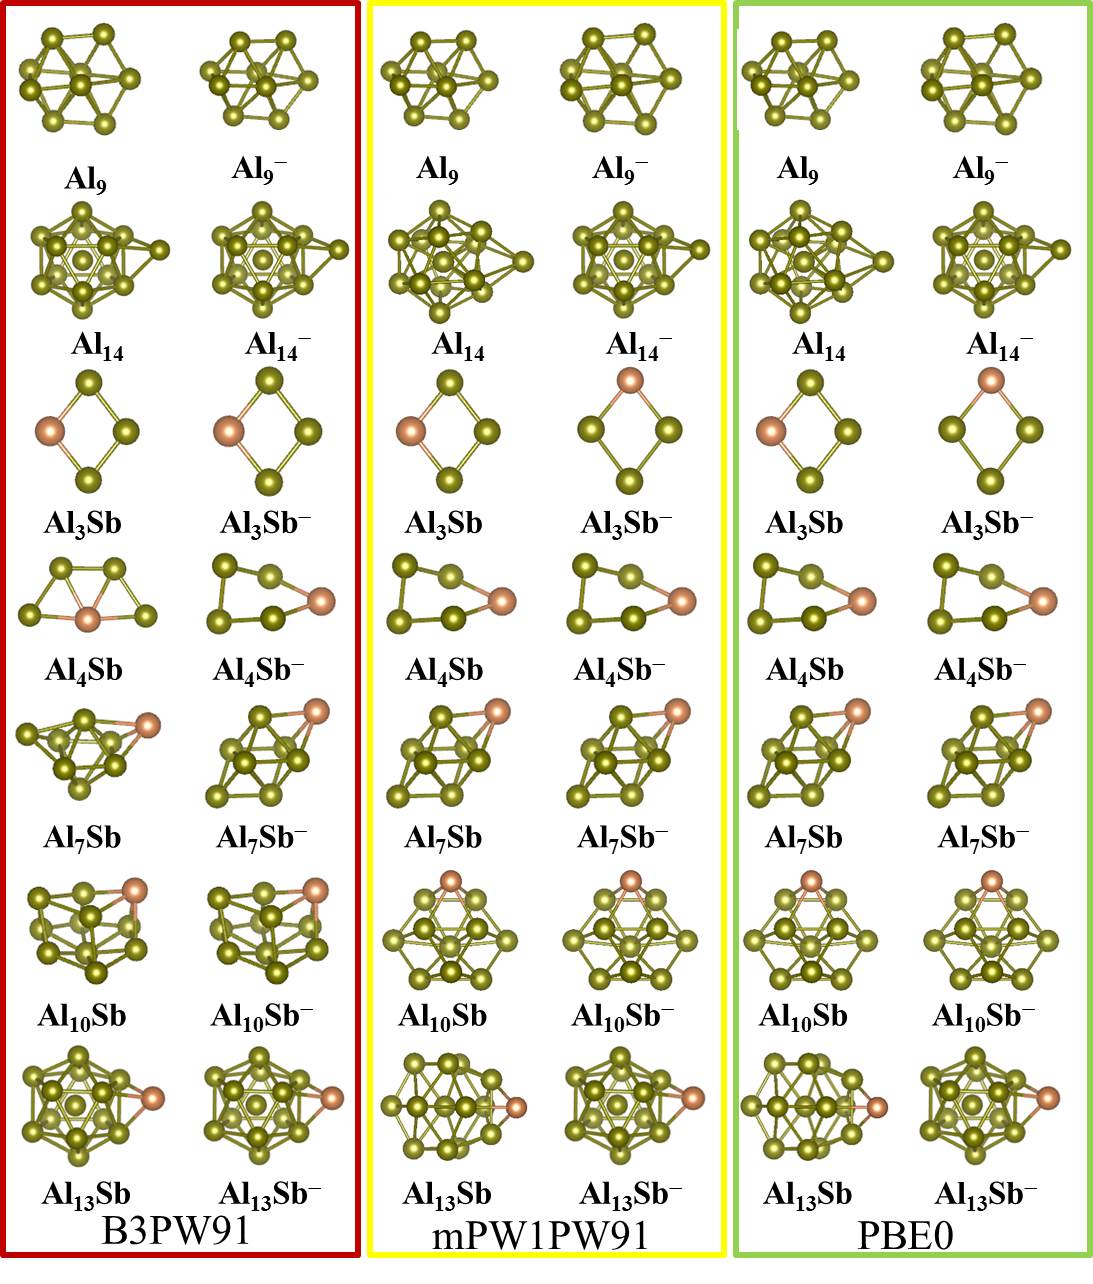
**

**Fig. S3 The clusters possess different ground state structure for neutral and anion Aln+1 and AlnSb( n=1-16) clusters based on different functionals.**


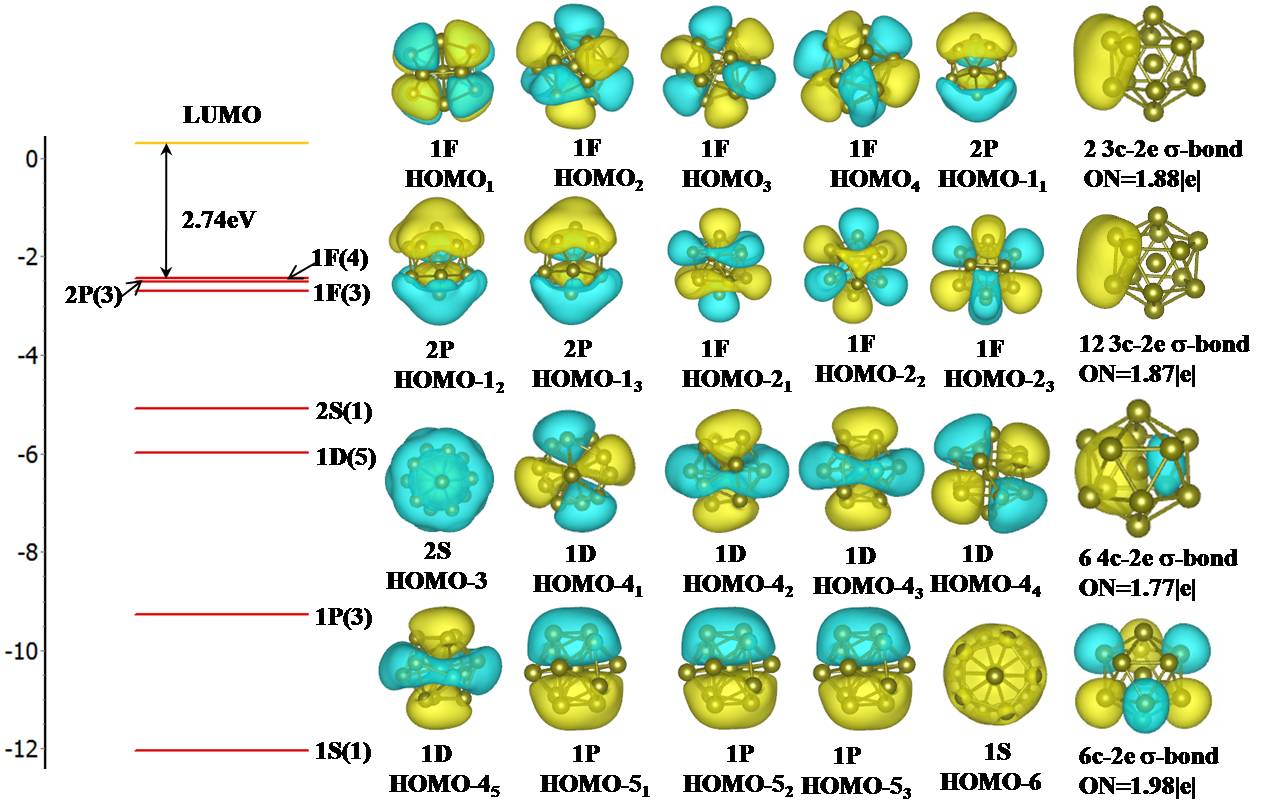


Fig. S4 Calculated molecular orbital energy levels and AdNDP chemical bonding analysis of the most stable structure of Al13clusters together with the molecular orbital maps of the HOMOs. where, ON presents for occupation number.

Table S1. Electronic states, symmetries, average binding energies *E*b (eV) and HOMO−LUMO energy gaps *E*gap (eV) of the most stable structures for Aln+1*q*(*q*=0,-1, *n*=1-16) clusters.

| clusters | State | Symm | *E*b | *E*gap |  | clusters | State | Symm | *E*b | *E*gap |
| --- | --- | --- | --- | --- | --- | --- | --- | --- | --- | --- |
| Al2 |  | *D*h | 0.72 | 1.31 | 3.60 | Al2- | 4g | *D*h | 1.25 | 2.06 |
| Al3 | 2A1' | *D*3h | 1.20 | 1.63 | 2.55 | Al3- | 1A1 | *D*3h | 1.62 | 1.57 |
| Al4 | 1Ag | *C*2h | 1.35 | 1.15 | 2.14 | Al4- | 2Ag | *C*2h | 1.83 | 1.53 |
| Al5 | 2B2 | *C*2v | 1.62 | 1.78 | 2.35 | Al5- | 1A' | *C*s | 1.95 | 1.36 |
| Al6 | 1A1g | *D*3d | 1.81 | 1.64 | 2.29 | Al6- | 2A1g | *D*3d | 2.15 | 2.19 |
| Al7 | 2A1 | *C*3v | 2.03 | 1.80 | 2.27 | Al7- | 1A1 | *C*3v | 2.27 | 1.61 |
| Al8 | 1Ag | *C*2h | 2.06 | 1.86 | 2.29 | Al8- | 2A' | *C*s | 2.28 | 1.51 |
| Al9 | 2A' | *C*s | 2.11 | 0.86 | 2.24 | Al9- | 1A | *C*2 | 2.35 | 1.49 |
| Al10 | 1A**'** | *C*s | 2.17 | 1.53 | 2.05 | Al10- | 2A' | *C*s | 2.38 | 1.50 |
| Al11 | 2A1 | *C*2v | 2.22 | 1.78 | 1.91 | Al11- | 1A' | *C*s | 2.42 | 1.54 |
| Al12 | 1A1 | *C*2v | 2.83 | 1.99 | 2.24 | Al12- | 2A' | *C*s | 2.45 | 1.19 |
| Al13 | 1A | *D*3d | 2.37 | 1.32 | 1.88 | Al13- | 1A | h | 2.59 | 2.74 |
| Al14 | 2A1 | *C*3 | 2.40 | 1.75 | 2.02 | Al14- | 2B2 | *C*2v | 2.55 | 1.34 |
| Al15 | 2B3u | *D*2h | 2.41 | 1.49 | 1.85 | Al15- | 1A | *D*3d | 2.56 | 1.51 |
| Al16 | 1A' | *C*s | 2.43 | 1.60 | 1.90 | Al16- | 2A' | *C*s | 2.57 | 1.48 |
| Al17 | 2B2u | *D*2h | 2.45 | 1.43 | 1.68 | Al17- | 1Ag | *D*2h | 2.58 | 1.41 |

Table S2. The calculated *ADE* and *VDE* values of the most stable structures for AlnSb(n=1-16) clusters based on different functionals, together with available experimental data.

|  | ADE | | | | VDE | | | |
| --- | --- | --- | --- | --- | --- | --- | --- | --- |
|  | mPW1PW91 | PBE0 | B3PW91 | Expt.1 | mPW1PW91 | PBE0 | B3PW91 | Expt.1 |
| 1 | 1.92 | 1.96 | 1.99 | 1.89 | 2.01 | 2.04 | 2.03 | 2.13 |
| 2 | 2.28 | 2.25 | 2.31 | 2.34 | 2.49 | 2.48 | 2.50 | 2.57 |
| 3 | 1.64 | 1.62 | 2.00 | 1.88 | 2.31 | 2.31 | 2.67 | 2.27 |
| 4 | 2.36 | 2.35 | 2.16 | 1.96 | 2.50 | 2.50 | 2.51 | 2.62 |
| 5 | 2.35 | 2.35 | 2.32 | 2.21 | 2.78 | 2.77 | 2.75 | 2.87 |
| 6 | 2.24 | 2.22 | 2.27 |  | 2.57 | 2.54 | 2.63 |  |
| 7 | 2.60 | 2.60 | 2.54 |  | 2.87 | 2.87 | 2.84 |  |
| 8 | 2.47 | 2.47 | 2.49 |  | 2.64 | 2.63 | 2.66 |  |
| 9 | 2.18 | 2.17 | 2.17 |  | 2.43 | 2.41 | 2.42 |  |
| 10 | 2.65 | 2.65 | 2.66 |  | 2.75 | 2.74 | 2.76 |  |
| 11 | 2.95 | 2.94 | 3.10 |  | 3.02 | 3.00 | 3.18 |  |
| 12 | 2.42 | 2.40 | 2.44 |  | 2.80 | 2.77 | 2.81 |  |
| 13 | 2.70 | 2.74 | 2.67 |  | 2.98 | 2.97 | 2.96 |  |
| 14 | 2.80 | 2.80 | 2.82 |  | 3.12 | 3.12 | 3.14 |  |
| 15 | 2.30 | 2.29 | 2.29 |  | 2.51 | 2.49 | 2.50 |  |
| 16 | 2.63 | 2.61 | 2.64 |  | 2.83 | 2.80 | 2.83 |  |

Table S3. The calculated *VIP* and *VEA* values of the most stable structures for AlnSb (n=1-16) clusters based different functionals, together with available theoretical data.

| Size | VEA | | | | VIP | | | |
| --- | --- | --- | --- | --- | --- | --- | --- | --- |
| mPW1PW91 | PBE0 | B3PW91 | Theor.1 | mPW1PW91 | PBE0 | B3PW91 | Theor.1 |
| 1 | 1.92 | 1.93 | 1.94 | 1.98 | 7.13 | 7.57 | 7.17 | 6.99 |
| 2 | 1.98 | 1.96 | 2.00 | 1.90 | 7.46 | 7.44 | 7.45 | 7.09 |
| 3 | 1.75 | 1.74 | 1.71 | 1.44 | 7.46 | 7.45 | 7.47 | 7.18 |
| 4 | 2.18 | 2.17 | 1.99 | 1.88 | 6.93 | 6.82 | 6.50 | 6.29 |
| 5 | 1.80 | 1.78 | 1.79 | 1.63 | 6.79 | 6.78 | 6.79 | 6.58 |
| 6 | 1.97 | 1.96 | 2.01 | 1.96 | 6.42 | 6.41 | 6.41 | 6.15 |
| 7 | 2.32 | 2.31 | 1.76 |  | 6.56 | 6.56 | 6.59 |  |
| 8 | 2.32 | 2.32 | 2.34 |  | 6.49 | 6.49 | 6.46 |  |
| 9 | 1.99 | 1.99 | 1.98 |  | 6.57 | 6.57 | 6.57 |  |
| 10 | 2.54 | 2.55 | 2.55 |  | 6.28 | 6.28 | 6.26 |  |
| 11 | 2.89 | 2.88 | 2.11 |  | 6.63 | 6.63 | 6.44 |  |
| 12 | 2.06 | 2.05 | 2.08 |  | 6.18 | 6.17 | 6.16 |  |
| 13 | 2.05 | 2.03 | 2.06 |  | 6.42 | 6.42 | 6.40 |  |
| 14 | 2.48 | 2.48 | 2.51 |  | 6.26 | 6.26 | 6.24 |  |
| 15 | 2.08 | 2.08 | 2.08 |  | 6.21 | 6.19 | 6.22 |  |
| 16 | 2.40 | 2.39 | 2.41 |  | 5.83 | 5.80 | 5.81 |  |

Table S4. The calculated *ADE* and *VDE* values of the most stable structures for Aln+1(n=1-16) clusters based on different functionals, together with available experimental and theoretical data.

| Size | ADE | | | | | VDE | | | | | |
| --- | --- | --- | --- | --- | --- | --- | --- | --- | --- | --- | --- |
| mPW1PW91 | PBE0 | B3PW91 | Expt2,3 |  | | mPW1PW91 | PBE0 | B3PW91 | Expt2,3. | Theor4. |
| 1 | 1.60 | 1.60 | 1.54 | 1.20 |  | | 1.62 | 1.62 | 1.62 | 1.61 | 1.45,1.47 |
| 2 | 1.73 | 1.72 | 1.75 | 1.40 |  | | 1.73 | 1.72 | 1.75 | 1.92 | 1.52,1.53 |
| 3 | 2.43 | 2.42 | 2.41 | 1.80 |  | | 2.54 | 2.53 | 2.53 | 2.20 | 2.38,2.39 |
| 4 | 2.11 | 2.11 | 2.13 | 1.92 |  | | 2.16 | 2.15 | 2.19 | 2.13 | 1.97 |
| 5 | 3.81 | 2.56 | 2.52 | 2.31 |  | | 2.81 | 2.81 | 2.79 | 2.63 | 2.63,2.62 |
| 6 | 2.10 | 2.10 | 2.11 | 2.08 |  | | 2.40 | 2.39 | 2.41 | 2.49 | 2.13,2.14 |
| 7 | 2.15 | 2.28 | 2.26 | 2.11 |  | | 2.34 | 2.54 | 2.45 | 2.45 | 2.03,2.05 |
| 8 | 2.84 | 2.83 | 2.63 | 2.57 |  | | 3.04 | 3.02 | 3.05 | 2.91 | 2.67,2.68 |
| 9 | 2.65 | 2.65 | 2.62 | 2.42 |  | | 2.86 | 2.86 | 2.83 | 2.94 | 2.49 |
| 10 | 2.73 | 2.71 | 2.70 | 2.51 |  | | 2.80 | 2.78 | 2.80 | 2.92 |  |
| 11 | 1.77 | 2.59 | 2.53 | 2.55 |  | | 2.85 | 2.85 | 2.82 | 2.85 |  |
| 12 | 3.41 | 3.42 | 3.40 | 3.42 |  | | 3.66 | 3.65 | 3.66 | 3.68 |  |
| 13 | 2.55 | 2.54 | 2.52 | 2.38 |  | | 2.76 | 2.75 | 2.74 | 2.68 |  |
| 14 | 2.79 | 2.78 | 2.77 | 2.39 |  | | 2.98 | 2.97 | 2.96 | 3.02 |  |
| 15 | 2.65 | 2.65 | 2.63 | 2.64 |  | | 3.02 | 3.02 | 3.00 | 2.97 |  |
| 16 | 2.69 | 2.68 | 2.72 | 2.78 |  | | 2.87 | 2.86 | 2.89 | 2.98 |  |

Table S5. The calculated *VIP* and *VEA* values of the most stable structures for Aln+1 (n=1-16) clusters based different functionals, together with available theoretical data.

| Size | VEA | | | | VIP | | | |
| --- | --- | --- | --- | --- | --- | --- | --- | --- |
| mPW1PW91 | PBE0 | B3PW91 | Theor.4 | mPW1PW91 | PBE0 | B3PW91 | Theor.4 |
| 1 | 1.59 | 1.57 | 1.48 |  | 6.69 | 6.67 | 6.27 | 6.29 |
| 2 | 1.73 | 1.72 | 1.75 | 1.63 | 6.86 | 6.84 | 6.85 | 6.08,6.76,6.78 |
| 3 | 2.26 | 2.24 | 2.24 | 2.13 | 6.50 | 6.49 | 6.52 | 6.50,6.69,6.70 |
| 4 | 2.05 | 2.05 | 2.07 | 2.00 | 6.78 | 6.78 | 6.76 | 6.66,6.63,6.64 |
| 5 | 3.09 | 2.28 | 2.25 | 2.22 | 6.82 | 6.82 | 6.83 | 6.82,6.61 |
| 6 | 1.80 | 1.80 | 1.82 | 1.81 | 6.37 | 6.37 | 6.35 | 6.32,6.14, |
| 7 | 1.98 | 1.97 | 1.97 | 1.96 | 6.56 | 6.55 | 6.55 | 6.48,6.24,6.25 |
| 8 | 2.66 | 2.65 | 2.45 | 2.36 | 6.70 | 6.69 | 6.93 | 6.57,6.37 |
| 9 | 2.39 | 2.39 | 2.36 | 2.29 | 6.46 | 6.45 | 6.47 | 6.32,5.96 |
| 10 | 2.60 | 2.58 | 2.51 | 2.52 | 6.32 | 6.30 | 6.34 | 6.30 |
| 11 | 1.91 | 1.91 | 1.91 | 2.12 | 7.16 | 6.36 | 6.39 | 6.29 |
| 12 | 3.13 | 3.14 | 3.11 | 3.10 | 6.90 | 6.93 | 6.87 | 6.84 |
| 13 | 2.32 | 2.32 | 2.29 | 2.22 | 6.16 | 6.15 | 6.34 | 6.31 |
| 14 | 2.58 | 2.57 | 2.29 | 2.53 | 6.17 | 6.16 | 6.00 | 6.09 |
| 15 |  | 2.21 | 2.24 | 2.21 | 6.04 | 6.03 | 6.04 | 6.02 |
| 16 |  | 2.50 | 2.54 | 2.51 | 5.90 | 5.89 | 5.89 | 5.86 |

Table S6. The average binding energies *E*b (eV) of the most stable structures for AlnSbq  and pure Aln+1q(q=0,-1,n=1-16) clusters.

| Size | AlnSb | | | AlnSb | | | Aln+1 | | | | Aln+1 | | | |
| --- | --- | --- | --- | --- | --- | --- | --- | --- | --- | --- | --- | --- | --- | --- |
| mPW1PW91 | PBE0 | B3PW91 | mPW1PW91 | PBE0 | B3PW91 | mPW1PW91 | PBE0 | B3PW91 | Theor.4 | mPW1PW91 | PBE0 | B3PW91 | Theor.4 |
| 1 | 0.77 | 0.79 | 0.79 | 1.42 | 1.56 | 1.54 | 0.69 | 0.71 | 0.72 | 0.76,0.75 | 1.23 | 1.27 | 1.25 | 1.37,1.35 |
| 2 | 1.35 | 1.38 | 1.35 | 1.73 | 1.99 | 1.96 | 1.21 | 1.24 | 1.20 | 1.27,1.24 | 1.63 | 1.66 | 1.62 | 1.73,1.69 |
| 3 | 1.73 | 1.76 | 1.73 | 1.72 | 2.06 | 2.10 | 1.36 | 1.39 | 1.35 | 1.48,1.44 | 1.84 | 1.88 | 1.83 | 1.95,1.91 |
| 4 | 1.74 | 1.78 | 1.77 | 1.79 | 2.17 | 2.10 | 1.65 | 1.69 | 1.62 | 1.70,1.66 | 1.97 | 2.01 | 1.95 | 2.07,2.02 |
| 5 | 1.99 | 2.05 | 1.98 | 1.96 | 2.37 | 2.28 | 1.62 | 1.88 | 1.81 | 1.91,1.86 | 2.18 | 2.23 | 2.15 | 2.30,2.25 |
| 6 | 2.07 | 2.12 | 2.04 | 1.94 | 2.38 | 2.29 | 2.07 | 2.13 | 2.03 | 2.15,2.09 | 2.30 | 2.35 | 2.27 | 2.41,2.35 |
| 7 | 2.13 | 2.18 | 2.09 | 2.00 | 2.45 | 2.35 | 2.09 | 2.15 | 2.06 | 2.16,2.10 | 2.30 | 2.37 | 2.28 | 2.40,2.34 |
| 8 | 2.23 | 2.28 | 2.19 | 2.05 | 2.51 | 2.41 | 2.13 | 2.19 | 2.11 | 2.13,2.17 | 2.39 | 2.45 | 2.35 | 2.49,2.43 |
| 9 | 2.29 | 2.35 | 2.25 | 2.05 | 2.52 | 2.41 | 2.21 | 2.27 | 2.17 | 2.27,2.21 | 2.42 | 2.48 | 2.38 | 2.52,2.46 |
| 10 | 2.30 | 2.36 | 2.25 | 2.08 | 2.56 | 2.45 | 2.26 | 2.32 | 2.22 |  | 2.47 | 2.53 | 2.42 |  |
| 11 | 2.35 | 2.42 | 2.31 | 2.14 | 2.63 | 2.52 | 2.40 | 2.39 | 2.83 |  | 2.50 | 2.57 | 2.45 |  |
| 12 | 2.44 | 2.52 | 2.39 | 2.17 | 2.67 | 2.54 | 2.42 | 2.49 | 2.37 |  | 2.65 | 2.72 | 2.59 |  |
| 13 | 2.47 | 2.53 | 2.41 | 2.20 | 2.70 | 2.57 | 2.45 | 2.53 | 2.40 |  | 2.60 | 2.67 | 2.55 |  |
| 14 | 2.52 | 2.59 | 2.46 | 2.24 | 2.75 | 2.61 | 2.46 | 2.53 | 2.41 |  | 2.61 | 2.69 | 2.56 |  |
| 15 | 2.53 | 2.60 | 2.47 | 2.21 | 2.72 | 2.47 | 2.49 | 2.56 | 2.43 |  | 2.62 | 2.73 | 2.57 |  |
| 16 | 2.49 | 2.56 | 2.44 | 2.18 | 2.69 | 2.56 | 2.51 | 2.57 | 2.45 |  | 2.64 | 2.74 | 2.58 |  |

Table S7. The most possible dissociation channels and the corresponding dissociation energies (eV) of the Al*n*Sb*q*(*q*=0,-1, *n*=1-16) clusters.

| clusters |  | DC | *E*D | clusters |  | DC | *E*D |
| --- | --- | --- | --- | --- | --- | --- | --- |
| AlSb |  | Al+ Sb | 1.58 | AlSb- |  | Al-+ Sb | 3.07 |
| Al2Sb |  | Al+AlSb | 2.49 | Al2Sb- |  | Al+AlSb- | 2.80 |
| Al3Sb |  | Al+Al2Sb | 2.84 | Al3Sb- |  | Al+Al2Sb- | 2.53 |
| Al4Sb |  | Al+Al3Sb | 1.94 | Al4Sb- |  | Al+Al3Sb- | 2.11 |
| Al5Sb |  | Al+Al4Sb | 3.01 | Al5Sb- |  | Al+Al4Sb- | 3.17 |
| Al6Sb |  | Al+Al5Sb | 2.39 | Al6Sb- |  | Al+Al5Sb- | 2.34 |
| Al7Sb |  | Al+Al6Sb | 2.51 | Al7Sb- |  | Al+Al6Sb- | 2.77 |
| Al8Sb |  | Al+Al7Sb | 2.92 | Al8Sb- |  | Al+Al7Sb- | 2.87 |
| Al9Sb |  | Al+Al8Sb | 2.80 | Al9Sb- |  | Al+Al8Sb- | 2.48 |
| Al10Sb |  | Al+Al9Sb | 2.31 | Al10Sb- |  | Al+Al9Sb- | 2.81 |
| Al11Sb |  | Al+Al10Sb | 2.91 | Al11Sb- |  | Al+Al10Sb- | 3.34 |
| Al12Sb |  | Al+Al11Sb | 3.40 | Al12Sb- |  | Al+Al11Sb- | 2.75 |
| Al13Sb |  | Al+Al12Sb | 2.71 | Al13Sb- |  | Al13-+Sb | 2.26 |
| Al14Sb |  | Al+Al13Sb | 3.09 | Al14Sb- |  | Al+Al13Sb- | 3.23 |
| Al15Sb |  | Al+Al14Sb | 2.69 | Al15Sb- |  | Al+Al14Sb- | 2.16 |
| Al16Sb |  | Al+Al15Sb | 1.85 | Al16Sb- |  | Al+Al15Sb- | 2.20 |

Table S8. The most possible dissociation channels and the corresponding dissociation energies (eV) of Aln+1*q*(*q*=0,-1, *n*=1-16) clusters.

| clusters |  | DC | *E*D | clusters |  | DC | *E*D |
| --- | --- | --- | --- | --- | --- | --- | --- |
| Al2 |  | Al+Al | 1.45 | Al2 |  | Al+Al | 2.49 |
| Al3 |  | Al+Al2 | 2.15 | Al3 |  | Al+Al2 | 2.37 |
| Al4 |  | Al+Al3 | 1.79 | Al4 |  | Al+Al3 | 2.45 |
| Al5 |  | Al+Al4 | 2.74 | Al5 |  | Al+Al4 | 2.46 |
| Al6 |  | Al+Al5 | 2.73 | Al6 |  | Al+Al5 | 3.12 |
| Al7 |  | Al+Al6 | 3.38 | Al7 |  | Al+Al6 | 2.98 |
| Al8 |  | Al+Al7 | 2.20 | Al8 |  | Al+Al7 | 2.35 |
| Al9 |  | Al+Al8 | 2.58 | Al9 |  | Al+Al8 | 2.94 |
| Al10 |  | Al+Al9 | 2.63 | Al10 |  | Al+Al9 | 2.62 |
| Al11 |  | Al+Al10 | 2.76 | Al11 |  | Al+Al10 | 2.84 |
| Al12 |  | Al+Al11 | 2.98 | Al12 |  | Al+Al11 | 2.82 |
| Al13 |  | Al+Al12 | 3.41 | Al13 |  | Al + Al12 | 4.28 |
| Al14 |  | Al+Al13 | 2.82 | Al14 |  | Al+Al13 | 1.94 |
| Al15 |  | Al+Al14 | 2.45 | Al15 |  | Al+Al14 | 2.70 |
| Al16 |  | Al+Al15 | 2.83 | Al16 |  | Al+Al15 | 2.69 |
| Al17 |  | Al+Al17 | 2.69 | Al17 |  | Al+Al16 | 2.77 |

Table S9. The natural charge (NC) of Sb atom, the local magnetic moments of the 5s and 5p states for Sb atom, 3s and 3p states for Al atom in the most stable structures of AlnSbq (*q*=0,-1, *n*=1-16) clusters, together with the total magnetic moments.

| AlnSb | | | | | | |  | AlnSb | | | | | |
| --- | --- | --- | --- | --- | --- | --- | --- | --- | --- | --- | --- | --- | --- |
| Size(n) | Sb | Sb(M/B) | | Al(M/B) | | Tot.  (B) |  | Sb | Sb(M/B) | | Al(M/B) | | Tot.  (B) |
| NC(e) | 5s | 5p | 3s | 3p |  | NC | 5s | 5p | 3s | 3p |
| 1 | -0.34 | 0.00 | 1.46 | 0.15 | 0.38 | 2.01 |  | -0.81 | -0.01 | 0.48 | 0.14 | 0.45 | 1.08 |
| 2 | -0.48 | 0.00 | 0.50 | 0.22 | 0.30 | 1.00 |  | -1.13 | 0.00 | 0.00 | 0.00 | 0.00 | 0.00 |
| 3 | -0.55 | 0.00 | 0.00 | 0.00 | 0.00 | 0.00 |  | -0.58 | 0.01 | 0.09 | 0.05 | 0.85 | 1.02 |
| 4 | -0.81 | 0.01 | -0.02 | 0.06 | 0.92 | 0.93 |  | -0.50 | 0.00 | 0.00 | 0.00 | 0.00 | 0.00 |
| 5 | -0.27 | 0.00 | 0.00 | 0.00 | 0.00 | 0.00 |  | -0.29 | -0.01 | 0.22 | 0.16 | 0.66 | 1.03 |
| 6 | -0.09 | 0.00 | 0.21 | 0.18 | 0.61 | 0.98 |  | -0.29 | 0.00 | 0.00 | 0.00 | 0.00 | 0.00 |
| 7 | -0.06 | 0.00 | 0.00 | 0.00 | 0.00 | 0.00 |  | -0.33 | -0.01 | 0.20 | 0.28 | 0.50 | 0.94 |
| 8 | -0.13 | 0.01 | -0.03 | 0.23 | 0.82 | 1.04 |  | -0.28 | 0.00 | 0.00 | 0.00 | 0.00 | 0.00 |
| 9 | -0.02 | 0.00 | 0.00 | 0.00 | 0.00 | 0.00 |  | -0.21 | 0.00 | 0.03 | 0.19 | 0.76 | 0.98 |
| 10 | -0.09 | 0.01 | -0.02 | 0.23 | 0.76 | 0.95 |  | -0.16 | 0.00 | 0.00 | 0.00 | 0.00 | 0.00 |
| 11 | 0.01 | 0.00 | 0.00 | 0.00 | 0.00 | 0.00 |  | -0.13 | 0.01 | -0.04 | 0.29 | 0.73 | 1.04 |
| 12 | 0.04 | 0.00 | 0.16 | 0.26 | 0.62 | 1.10 |  | -0.11 | 0.00 | 0.00 | 0.00 | 0.00 | 0.00 |
| 13 | 0.04 | 0.00 | 0.00 | 0.00 | 0.00 | 0.00 |  | -0.12 | 0.00 | 0.26 | 0.24 | 0.53 | 0.98 |
| 14 | 0.01 | -0.01 | 0.20 | 0.33 | 0.40 | 0.96 |  | -0.15 | 0.00 | 0.00 | 0.00 | 0.00 | 0.00 |
| 15 | 0.02 | 0.00 | 0.00 | 0.00 | 0.00 | 0.00 |  | -0.12 | 0.00 | 0.00 | 0.24 | 0.70 | 0.94 |
| 16 | -0.09 | 0.00 | 0.05 | 0.17 | 0.71 | 0.95 |  | -0.22 | 0.00 | 0.00 | 0.00 | 0.00 | 0.00 |

**References:**

[1] J. J. Melko, P. A. Clayborne, C. E. Jones Jr., J. U. Reveles, U. Gupta, S. N. Khanna, and A. W. Castleman Jr.,J. Phys. Chem. A **114***,* 2045 (2010).

[2] X. D. Xing, J. J. Wang, X. Y. Kuang, X. X. Xia, C. Lu, and G. Maroulis, Phys. Chem. Chem. Phys. 18, 26177 (2016).

[3] X. Li, H. B. Wu, X. B. Wang, L. S. Wang, Phys. Rev. Lett. **81**, 1909 (1998).

[4] S. Paranthaman, K. Y. Hong, J. H. Kim, D. E. Kim, T. K. Kim, J. Phys. Chem. A. 117, 9293 (2013).
