# Supplementary material for: Study of the Geometric Structures, Electronic and Magnetic Properties of Aluminium-Antimony Alloy Clusters
Source: publisher site journal article supplement (doi:10.1515/zna-2018-0345), 2018-11-16
Supplement: Supplementary file 1 [file Supplementary materials.pdf › Supplementary materials.pdf]

## **Supplementary materials**

### **Study of the geometric structures, electronic and magnetic properties of aluminum-antimony alloy clusters**

Ai-Jie Mao<sup>\*</sup>, Xiao-Yu Kuang, Hao Cheng, Li-Huan Zhang, Xiao-Rong Cheng

Institute of Atomic and Molecular Physics, Sichuan University, Chengdu 610065, China

<sup>\*</sup>Correspondence

author. E-mail: scu\_mij@126.com

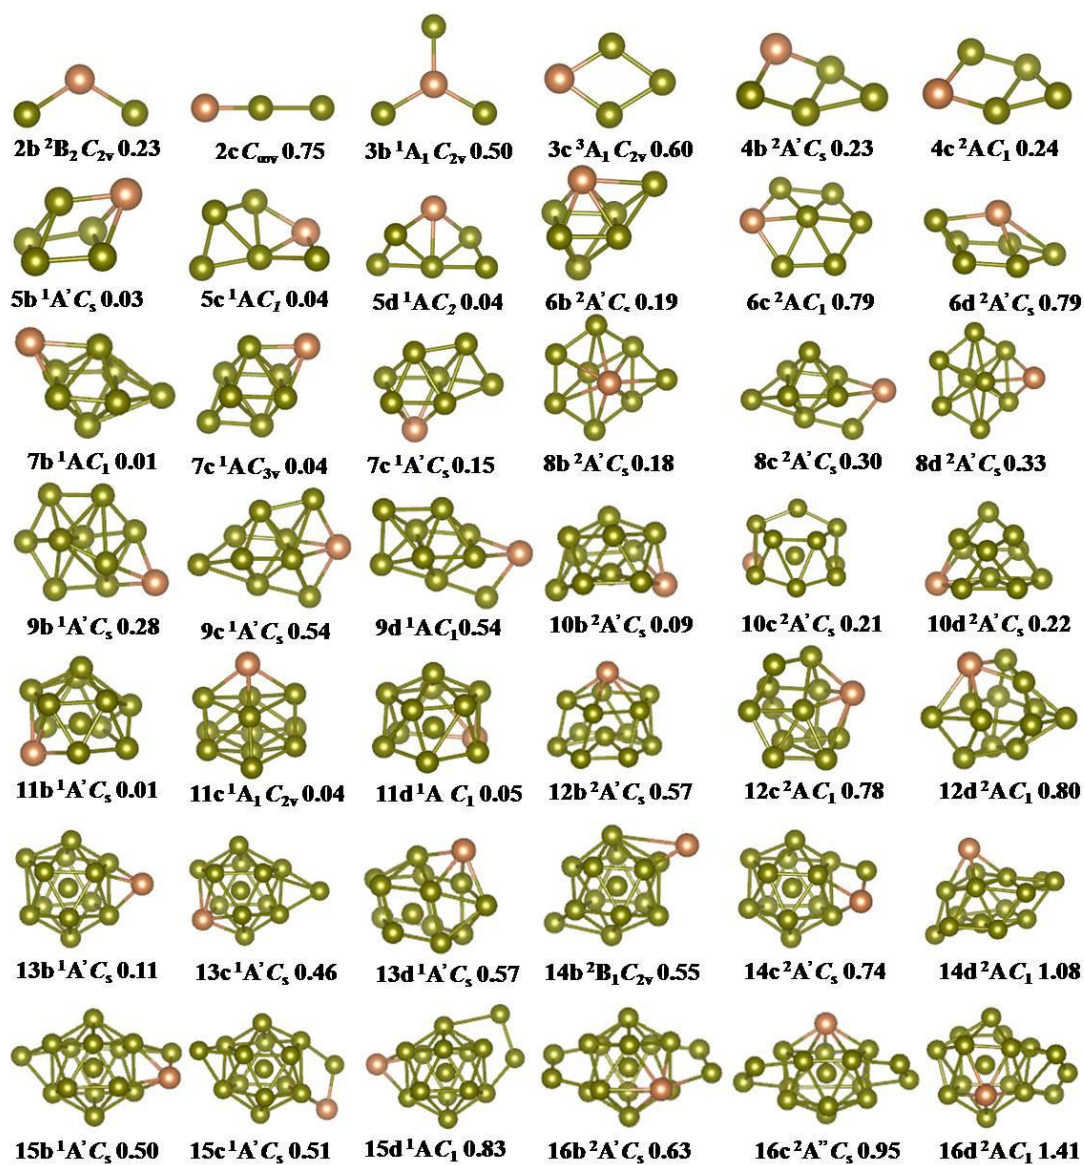

Fig. S1 The metastable isomers of  $Al_nSb$  ( $n=1-16$ ) clusters, together with point symmetry and relative energies.

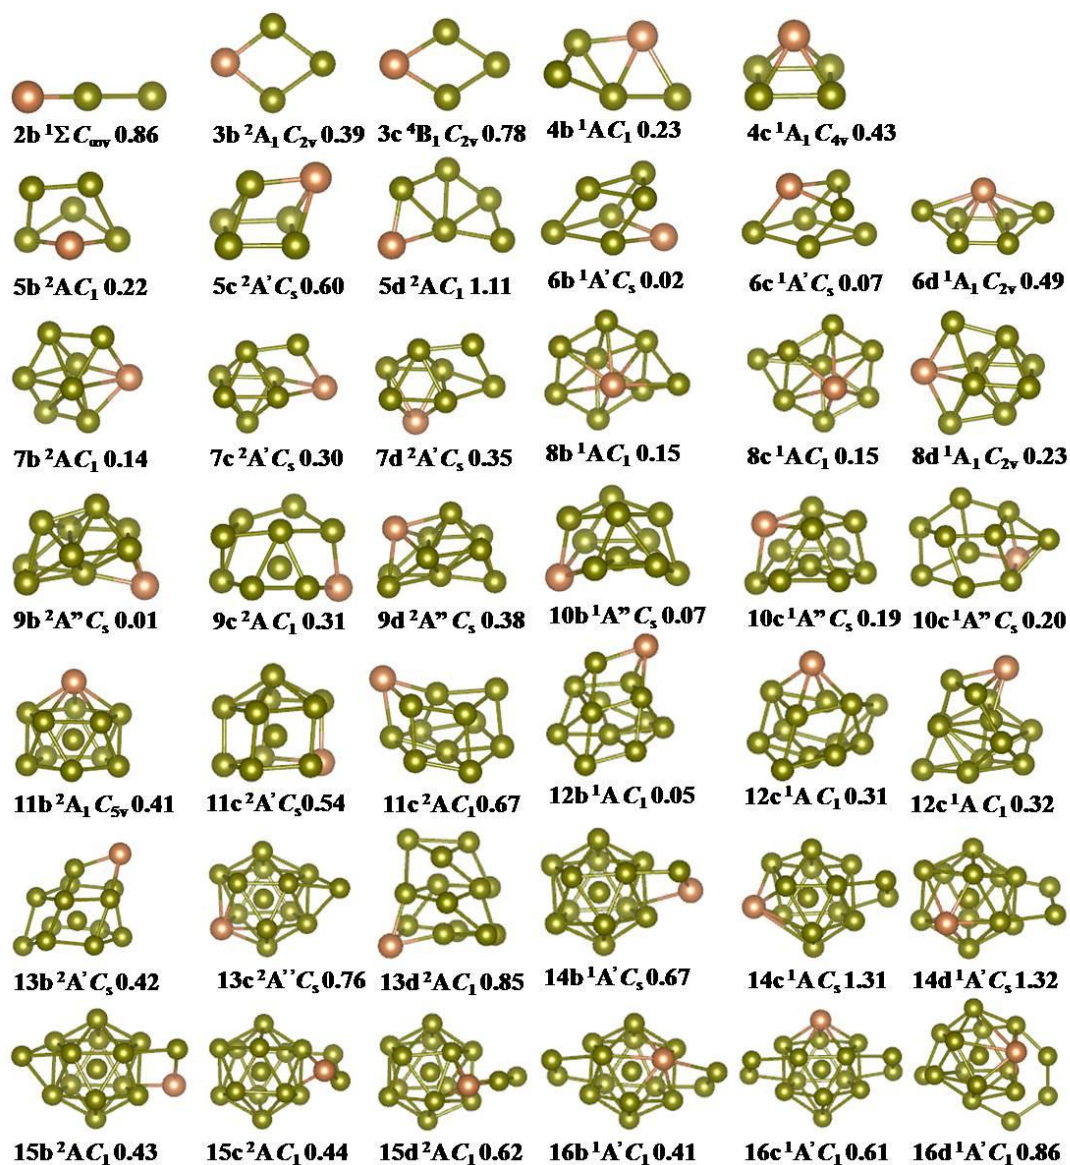

**Fig. S2** The metastable isomers of  $Al_nSb^-$  ( $n=1-16$ ) clusters, together with point symmetry and relative energies.

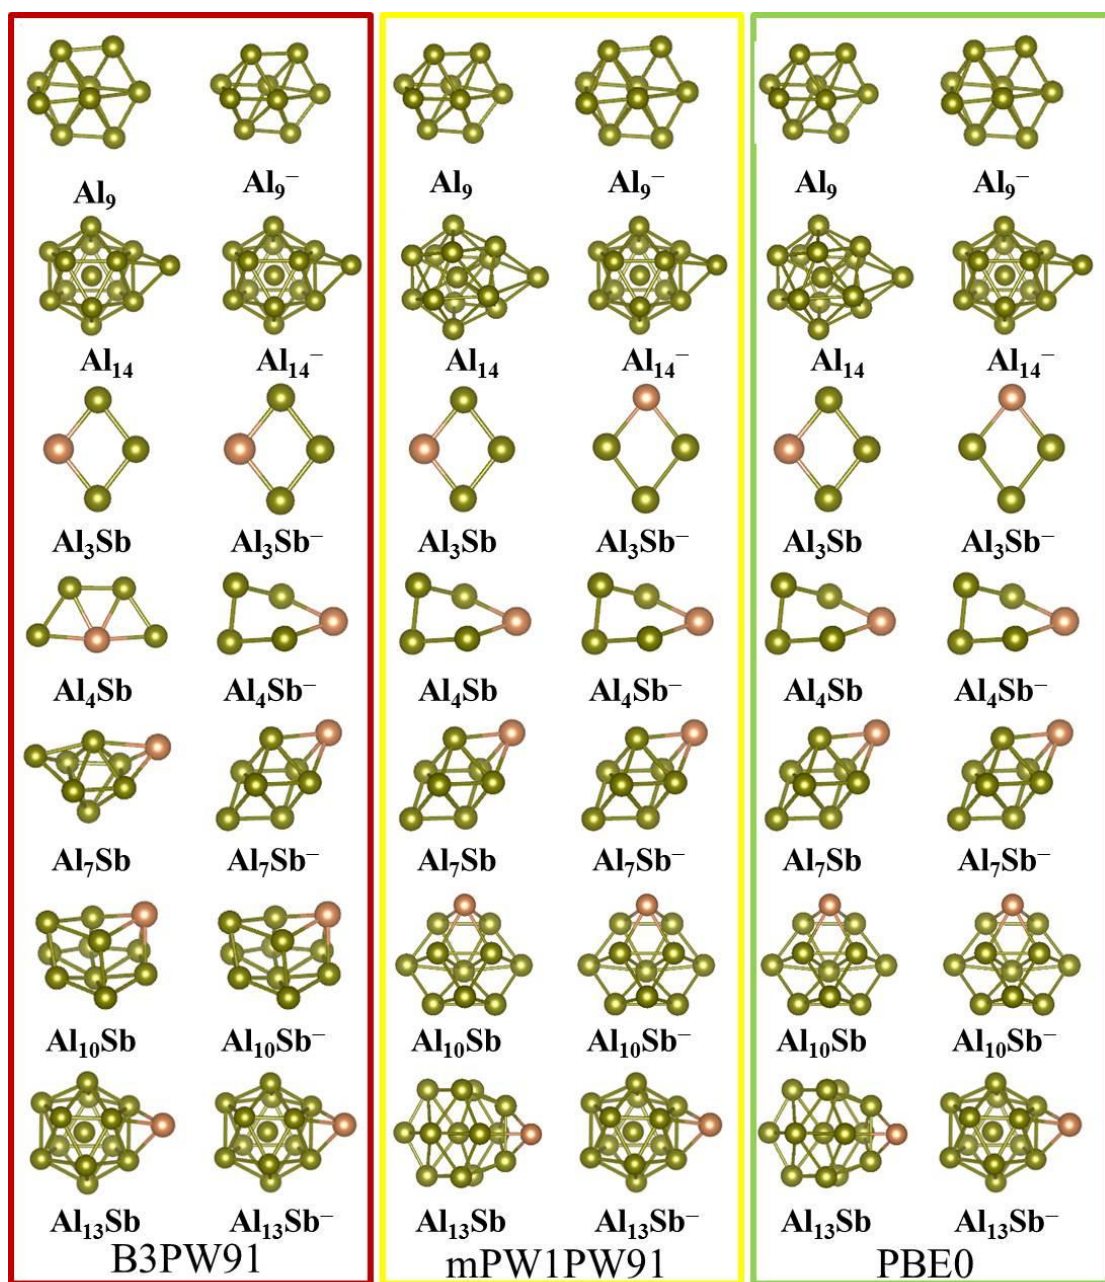

**Fig. S3** The clusters possess different ground state structure for neutral and anion  $\text{Al}_{n+1}$  and  $\text{Al}_n\text{Sb}$  ( $n=1-16$ ) clusters based on different functionals.



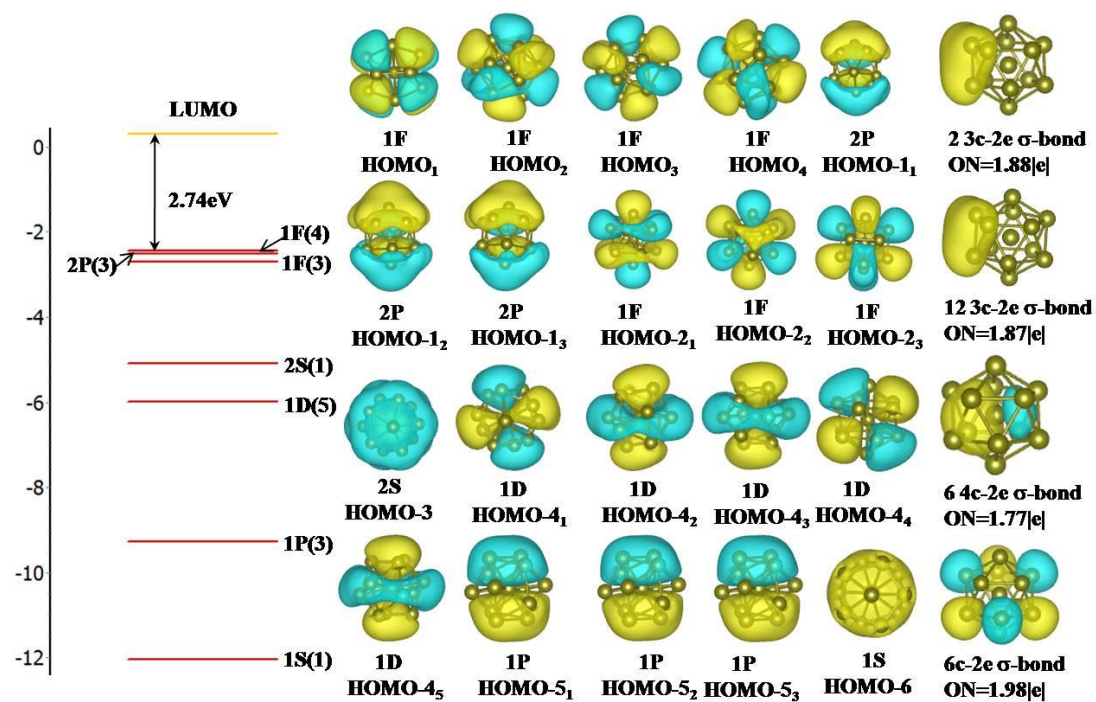

Fig. S4 Calculated molecular orbital energy levels and AdNDP chemical bonding analysis of the most stable structure of  $\text{Al}_{13}^-$  clusters together with the molecular orbital maps of the HOMOs. where, ON presents for occupation number.

Table S1. Electronic states, symmetries, average binding energies  $E_b$  (eV) and HOMO–LUMO energy gaps  $E_{\text{gap}}$  (eV) of the most stable structures for  $\text{Al}_{n+1}^q$  ( $q=0,-1$ ,  $n=1-16$ ) clusters.

| clusters         | State             | Symm           | $E_b$ | $E_{\text{gap}}$ | $\eta$ | clusters           | State             | Symm           | $E_b$ | $E_{\text{gap}}$ |
|------------------|-------------------|----------------|-------|------------------|--------|--------------------|-------------------|----------------|-------|------------------|
| $\text{Al}_2$    |                   | $D_{\infty h}$ | 0.72  | 1.31             | 3.60   | $\text{Al}_2^-$    | $^4\Sigma_g$      | $D_{\infty h}$ | 1.25  | 2.06             |
| $\text{Al}_3$    | $^2\text{A}_1'$   | $D_{3h}$       | 1.20  | 1.63             | 2.55   | $\text{Al}_3^-$    | $^1\text{A}_1$    | $D_{3h}$       | 1.62  | 1.57             |
| $\text{Al}_4$    | $^1\text{A}_g$    | $C_{2h}$       | 1.35  | 1.15             | 2.14   | $\text{Al}_4^-$    | $^2\text{A}_g$    | $C_{2h}$       | 1.83  | 1.53             |
| $\text{Al}_5$    | $^2\text{B}_2$    | $C_{2v}$       | 1.62  | 1.78             | 2.35   | $\text{Al}_5^-$    | $^1\text{A}'$     | $C_s$          | 1.95  | 1.36             |
| $\text{Al}_6$    | $^1\text{A}_{1g}$ | $D_{3d}$       | 1.81  | 1.64             | 2.29   | $\text{Al}_6^-$    | $^2\text{A}_{1g}$ | $D_{3d}$       | 2.15  | 2.19             |
| $\text{Al}_7$    | $^2\text{A}_1$    | $C_{3v}$       | 2.03  | 1.80             | 2.27   | $\text{Al}_7^-$    | $^1\text{A}_1$    | $C_{3v}$       | 2.27  | 1.61             |
| $\text{Al}_8$    | $^1\text{A}_g$    | $C_{2h}$       | 2.06  | 1.86             | 2.29   | $\text{Al}_8^-$    | $^2\text{A}'$     | $C_s$          | 2.28  | 1.51             |
| $\text{Al}_9$    | $^2\text{A}'$     | $C_s$          | 2.11  | 0.86             | 2.24   | $\text{Al}_9^-$    | $^1\text{A}$      | $C_2$          | 2.35  | 1.49             |
| $\text{Al}_{10}$ | $^1\text{A}'$     | $C_s$          | 2.17  | 1.53             | 2.05   | $\text{Al}_{10}^-$ | $^2\text{A}'$     | $C_s$          | 2.38  | 1.50             |
| $\text{Al}_{11}$ | $^2\text{A}_1$    | $C_{2v}$       | 2.22  | 1.78             | 1.91   | $\text{Al}_{11}^-$ | $^1\text{A}'$     | $C_s$          | 2.42  | 1.54             |
| $\text{Al}_{12}$ | $^1\text{A}_1$    | $C_{2v}$       | 2.83  | 1.99             | 2.24   | $\text{Al}_{12}^-$ | $^2\text{A}'$     | $C_s$          | 2.45  | 1.19             |
| $\text{Al}_{13}$ | $^1\text{A}$      | $D_{3d}$       | 2.37  | 1.32             | 1.88   | $\text{Al}_{13}^-$ | $^1\text{A}$      | $I_h$          | 2.59  | 2.74             |
| $\text{Al}_{14}$ | $^2\text{A}_1$    | $C_3$          | 2.40  | 1.75             | 2.02   | $\text{Al}_{14}^-$ | $^2\text{B}_2$    | $C_{2v}$       | 2.55  | 1.34             |
| $\text{Al}_{15}$ | $^2\text{B}_{3u}$ | $D_{2h}$       | 2.41  | 1.49             | 1.85   | $\text{Al}_{15}^-$ | $^1\text{A}$      | $D_{3d}$       | 2.56  | 1.51             |
| $\text{Al}_{16}$ | $^1\text{A}'$     | $C_s$          | 2.43  | 1.60             | 1.90   | $\text{Al}_{16}^-$ | $^2\text{A}'$     | $C_s$          | 2.57  | 1.48             |
| $\text{Al}_{17}$ | $^2\text{B}_{2u}$ | $D_{2h}$       | 2.45  | 1.43             | 1.68   | $\text{Al}_{17}^-$ | $^1\text{A}_g$    | $D_{2h}$       | 2.58  | 1.41             |

Table S2. The calculated *ADE* and *VDE* values of the most stable structures for  $\text{Al}_n\text{Sb}$  ( $n=1-16$ ) clusters based on different functionals, together with available experimental data.

|    | ADE      |      |        |                    | VDE      |      |        |                    |
|----|----------|------|--------|--------------------|----------|------|--------|--------------------|
|    | mPW1PW91 | PBE0 | B3PW91 | Expt. <sup>1</sup> | mPW1PW91 | PBE0 | B3PW91 | Expt. <sup>1</sup> |
| 1  | 1.92     | 1.96 | 1.99   | 1.89               | 2.01     | 2.04 | 2.03   | 2.13               |
| 2  | 2.28     | 2.25 | 2.31   | 2.34               | 2.49     | 2.48 | 2.50   | 2.57               |
| 3  | 1.64     | 1.62 | 2.00   | 1.88               | 2.31     | 2.31 | 2.67   | 2.27               |
| 4  | 2.36     | 2.35 | 2.16   | 1.96               | 2.50     | 2.50 | 2.51   | 2.62               |
| 5  | 2.35     | 2.35 | 2.32   | 2.21               | 2.78     | 2.77 | 2.75   | 2.87               |
| 6  | 2.24     | 2.22 | 2.27   |                    | 2.57     | 2.54 | 2.63   |                    |
| 7  | 2.60     | 2.60 | 2.54   |                    | 2.87     | 2.87 | 2.84   |                    |
| 8  | 2.47     | 2.47 | 2.49   |                    | 2.64     | 2.63 | 2.66   |                    |
| 9  | 2.18     | 2.17 | 2.17   |                    | 2.43     | 2.41 | 2.42   |                    |
| 10 | 2.65     | 2.65 | 2.66   |                    | 2.75     | 2.74 | 2.76   |                    |
| 11 | 2.95     | 2.94 | 3.10   |                    | 3.02     | 3.00 | 3.18   |                    |
| 12 | 2.42     | 2.40 | 2.44   |                    | 2.80     | 2.77 | 2.81   |                    |
| 13 | 2.70     | 2.74 | 2.67   |                    | 2.98     | 2.97 | 2.96   |                    |
| 14 | 2.80     | 2.80 | 2.82   |                    | 3.12     | 3.12 | 3.14   |                    |
| 15 | 2.30     | 2.29 | 2.29   |                    | 2.51     | 2.49 | 2.50   |                    |
| 16 | 2.63     | 2.61 | 2.64   |                    | 2.83     | 2.80 | 2.83   |                    |

Table S3. The calculated *VIP* and *VEA* values of the most stable structures for  $\text{Al}_n\text{Sb}$  ( $n=1-16$ ) clusters based different functionals, together with available theoretical data.

| Size | VEA      |      |        |                     | VIP      |      |        |                     |
|------|----------|------|--------|---------------------|----------|------|--------|---------------------|
|      | mPW1PW91 | PBE0 | B3PW91 | Theor. <sup>1</sup> | mPW1PW91 | PBE0 | B3PW91 | Theor. <sup>1</sup> |
| 1    | 1.92     | 1.93 | 1.94   | 1.98                | 7.13     | 7.57 | 7.17   | 6.99                |
| 2    | 1.98     | 1.96 | 2.00   | 1.90                | 7.46     | 7.44 | 7.45   | 7.09                |
| 3    | 1.75     | 1.74 | 1.71   | 1.44                | 7.46     | 7.45 | 7.47   | 7.18                |
| 4    | 2.18     | 2.17 | 1.99   | 1.88                | 6.93     | 6.82 | 6.50   | 6.29                |
| 5    | 1.80     | 1.78 | 1.79   | 1.63                | 6.79     | 6.78 | 6.79   | 6.58                |
| 6    | 1.97     | 1.96 | 2.01   | 1.96                | 6.42     | 6.41 | 6.41   | 6.15                |
| 7    | 2.32     | 2.31 | 1.76   |                     | 6.56     | 6.56 | 6.59   |                     |
| 8    | 2.32     | 2.32 | 2.34   |                     | 6.49     | 6.49 | 6.46   |                     |
| 9    | 1.99     | 1.99 | 1.98   |                     | 6.57     | 6.57 | 6.57   |                     |
| 10   | 2.54     | 2.55 | 2.55   |                     | 6.28     | 6.28 | 6.26   |                     |
| 11   | 2.89     | 2.88 | 2.11   |                     | 6.63     | 6.63 | 6.44   |                     |
| 12   | 2.06     | 2.05 | 2.08   |                     | 6.18     | 6.17 | 6.16   |                     |
| 13   | 2.05     | 2.03 | 2.06   |                     | 6.42     | 6.42 | 6.40   |                     |
| 14   | 2.48     | 2.48 | 2.51   |                     | 6.26     | 6.26 | 6.24   |                     |
| 15   | 2.08     | 2.08 | 2.08   |                     | 6.21     | 6.19 | 6.22   |                     |
| 16   | 2.40     | 2.39 | 2.41   |                     | 5.83     | 5.80 | 5.81   |                     |

Table S4. The calculated *ADE* and *VDE* values of the most stable structures for  $\text{Al}_{n+1}^-$  ( $n=1-16$ ) clusters based on different functionals, together with available experimental and theoretical data.

| Size | ADE      |      |        |                     | VDE      |      |        |                     |                    |
|------|----------|------|--------|---------------------|----------|------|--------|---------------------|--------------------|
|      | mPW1PW91 | PBE0 | B3PW91 | Expt <sup>2,3</sup> | mPW1PW91 | PBE0 | B3PW91 | Expt <sup>2,3</sup> | Theor <sup>4</sup> |
| 1    | 1.60     | 1.60 | 1.54   | 1.20                | 1.62     | 1.62 | 1.62   | 1.61                | 1.45,1.47          |
| 2    | 1.73     | 1.72 | 1.75   | 1.40                | 1.73     | 1.72 | 1.75   | 1.92                | 1.52,1.53          |
| 3    | 2.43     | 2.42 | 2.41   | 1.80                | 2.54     | 2.53 | 2.53   | 2.20                | 2.38,2.39          |
| 4    | 2.11     | 2.11 | 2.13   | 1.92                | 2.16     | 2.15 | 2.19   | 2.13                | 1.97               |
| 5    | 3.81     | 2.56 | 2.52   | 2.31                | 2.81     | 2.81 | 2.79   | 2.63                | 2.63,2.62          |
| 6    | 2.10     | 2.10 | 2.11   | 2.08                | 2.40     | 2.39 | 2.41   | 2.49                | 2.13,2.14          |
| 7    | 2.15     | 2.28 | 2.26   | 2.11                | 2.34     | 2.54 | 2.45   | 2.45                | 2.03,2.05          |
| 8    | 2.84     | 2.83 | 2.63   | 2.57                | 3.04     | 3.02 | 3.05   | 2.91                | 2.67,2.68          |
| 9    | 2.65     | 2.65 | 2.62   | 2.42                | 2.86     | 2.86 | 2.83   | 2.94                | 2.49               |
| 10   | 2.73     | 2.71 | 2.70   | 2.51                | 2.80     | 2.78 | 2.80   | 2.92                |                    |
| 11   | 1.77     | 2.59 | 2.53   | 2.55                | 2.85     | 2.85 | 2.82   | 2.85                |                    |
| 12   | 3.41     | 3.42 | 3.40   | 3.42                | 3.66     | 3.65 | 3.66   | 3.68                |                    |
| 13   | 2.55     | 2.54 | 2.52   | 2.38                | 2.76     | 2.75 | 2.74   | 2.68                |                    |
| 14   | 2.79     | 2.78 | 2.77   | 2.39                | 2.98     | 2.97 | 2.96   | 3.02                |                    |
| 15   | 2.65     | 2.65 | 2.63   | 2.64                | 3.02     | 3.02 | 3.00   | 2.97                |                    |
| 16   | 2.69     | 2.68 | 2.72   | 2.78                | 2.87     | 2.86 | 2.89   | 2.98                |                    |



Table S5. The calculated *VIP* and *VEA* values of the most stable structures for  $\text{Al}_{n+1}$  (n=1-16) clusters based different functionals, together with available theoretical data.

| Size | VEA      |      |        |                     | VIP      |      |        |                     |
|------|----------|------|--------|---------------------|----------|------|--------|---------------------|
|      | mPW1PW91 | PBE0 | B3PW91 | Theor. <sup>4</sup> | mPW1PW91 | PBE0 | B3PW91 | Theor. <sup>4</sup> |
| 1    | 1.59     | 1.57 | 1.48   |                     | 6.69     | 6.67 | 6.27   | 6.29                |
| 2    | 1.73     | 1.72 | 1.75   | 1.63                | 6.86     | 6.84 | 6.85   | 6.08,6.76,6.78      |
| 3    | 2.26     | 2.24 | 2.24   | 2.13                | 6.50     | 6.49 | 6.52   | 6.50,6.69,6.70      |
| 4    | 2.05     | 2.05 | 2.07   | 2.00                | 6.78     | 6.78 | 6.76   | 6.66,6.63,6.64      |
| 5    | 3.09     | 2.28 | 2.25   | 2.22                | 6.82     | 6.82 | 6.83   | 6.82,6.61           |
| 6    | 1.80     | 1.80 | 1.82   | 1.81                | 6.37     | 6.37 | 6.35   | 6.32,6.14,          |
| 7    | 1.98     | 1.97 | 1.97   | 1.96                | 6.56     | 6.55 | 6.55   | 6.48,6.24,6.25      |
| 8    | 2.66     | 2.65 | 2.45   | 2.36                | 6.70     | 6.69 | 6.93   | 6.57,6.37           |
| 9    | 2.39     | 2.39 | 2.36   | 2.29                | 6.46     | 6.45 | 6.47   | 6.32,5.96           |
| 10   | 2.60     | 2.58 | 2.51   | 2.52                | 6.32     | 6.30 | 6.34   | 6.30                |
| 11   | 1.91     | 1.91 | 1.91   | 2.12                | 7.16     | 6.36 | 6.39   | 6.29                |
| 12   | 3.13     | 3.14 | 3.11   | 3.10                | 6.90     | 6.93 | 6.87   | 6.84                |
| 13   | 2.32     | 2.32 | 2.29   | 2.22                | 6.16     | 6.15 | 6.34   | 6.31                |
| 14   | 2.58     | 2.57 | 2.29   | 2.53                | 6.17     | 6.16 | 6.00   | 6.09                |
| 15   |          | 2.21 | 2.24   | 2.21                | 6.04     | 6.03 | 6.04   | 6.02                |
| 16   |          | 2.50 | 2.54   | 2.51                | 5.90     | 5.89 | 5.89   | 5.86                |

Table S6. The average binding energies  $E_b$  (eV) of the most stable structures for  $Al_nSb^q$  and pure  $Al_{n+1}^q$  ( $q=0,-1, n=1-16$ ) clusters.

| Size | $Al_nSb$ |      |        | $Al_nSb$ |      |        | $Al_{n+1}$ |      |        |                     | $Al_{n+1}$ |      |        |                     |
|------|----------|------|--------|----------|------|--------|------------|------|--------|---------------------|------------|------|--------|---------------------|
|      | mPW1PW91 | PBE0 | B3PW91 | mPW1PW91 | PBE0 | B3PW91 | mPW1PW91   | PBE0 | B3PW91 | Theor. <sup>4</sup> | mPW1PW91   | PBE0 | B3PW91 | Theor. <sup>4</sup> |
| 1    | 0.77     | 0.79 | 0.79   | 1.42     | 1.56 | 1.54   | 0.69       | 0.71 | 0.72   | 0.76,0.75           | 1.23       | 1.27 | 1.25   | 1.37,1.35           |
| 2    | 1.35     | 1.38 | 1.35   | 1.73     | 1.99 | 1.96   | 1.21       | 1.24 | 1.20   | 1.27,1.24           | 1.63       | 1.66 | 1.62   | 1.73,1.69           |
| 3    | 1.73     | 1.76 | 1.73   | 1.72     | 2.06 | 2.10   | 1.36       | 1.39 | 1.35   | 1.48,1.44           | 1.84       | 1.88 | 1.83   | 1.95,1.91           |
| 4    | 1.74     | 1.78 | 1.77   | 1.79     | 2.17 | 2.10   | 1.65       | 1.69 | 1.62   | 1.70,1.66           | 1.97       | 2.01 | 1.95   | 2.07,2.02           |
| 5    | 1.99     | 2.05 | 1.98   | 1.96     | 2.37 | 2.28   | 1.62       | 1.88 | 1.81   | 1.91,1.86           | 2.18       | 2.23 | 2.15   | 2.30,2.25           |
| 6    | 2.07     | 2.12 | 2.04   | 1.94     | 2.38 | 2.29   | 2.07       | 2.13 | 2.03   | 2.15,2.09           | 2.30       | 2.35 | 2.27   | 2.41,2.35           |
| 7    | 2.13     | 2.18 | 2.09   | 2.00     | 2.45 | 2.35   | 2.09       | 2.15 | 2.06   | 2.16,2.10           | 2.30       | 2.37 | 2.28   | 2.40,2.34           |
| 8    | 2.23     | 2.28 | 2.19   | 2.05     | 2.51 | 2.41   | 2.13       | 2.19 | 2.11   | 2.13,2.17           | 2.39       | 2.45 | 2.35   | 2.49,2.43           |
| 9    | 2.29     | 2.35 | 2.25   | 2.05     | 2.52 | 2.41   | 2.21       | 2.27 | 2.17   | 2.27,2.21           | 2.42       | 2.48 | 2.38   | 2.52,2.46           |
| 10   | 2.30     | 2.36 | 2.25   | 2.08     | 2.56 | 2.45   | 2.26       | 2.32 | 2.22   |                     | 2.47       | 2.53 | 2.42   |                     |
| 11   | 2.35     | 2.42 | 2.31   | 2.14     | 2.63 | 2.52   | 2.40       | 2.39 | 2.83   |                     | 2.50       | 2.57 | 2.45   |                     |
| 12   | 2.44     | 2.52 | 2.39   | 2.17     | 2.67 | 2.54   | 2.42       | 2.49 | 2.37   |                     | 2.65       | 2.72 | 2.59   |                     |
| 13   | 2.47     | 2.53 | 2.41   | 2.20     | 2.70 | 2.57   | 2.45       | 2.53 | 2.40   |                     | 2.60       | 2.67 | 2.55   |                     |
| 14   | 2.52     | 2.59 | 2.46   | 2.24     | 2.75 | 2.61   | 2.46       | 2.53 | 2.41   |                     | 2.61       | 2.69 | 2.56   |                     |
| 15   | 2.53     | 2.60 | 2.47   | 2.21     | 2.72 | 2.47   | 2.49       | 2.56 | 2.43   |                     | 2.62       | 2.73 | 2.57   |                     |
| 16   | 2.49     | 2.56 | 2.44   | 2.18     | 2.69 | 2.56   | 2.51       | 2.57 | 2.45   |                     | 2.64       | 2.74 | 2.58   |                     |

Table S7. The most possible dissociation channels and the corresponding dissociation energies (eV) of the  $\text{Al}_n\text{Sb}^q$  ( $q=0,-1$ ,  $n=1-16$ ) clusters.

| clusters                  | DC                                    | $E_D$ | clusters                    | DC                                      | $E_D$ |
|---------------------------|---------------------------------------|-------|-----------------------------|-----------------------------------------|-------|
| $\text{AlSb}$             | $\text{Al} + \text{Sb}$               | 1.58  | $\text{AlSb}^-$             | $\text{Al}^- + \text{Sb}$               | 3.07  |
| $\text{Al}_2\text{Sb}$    | $\text{Al} + \text{AlSb}$             | 2.49  | $\text{Al}_2\text{Sb}^-$    | $\text{Al} + \text{AlSb}^-$             | 2.80  |
| $\text{Al}_3\text{Sb}$    | $\text{Al} + \text{Al}_2\text{Sb}$    | 2.84  | $\text{Al}_3\text{Sb}^-$    | $\text{Al} + \text{Al}_2\text{Sb}^-$    | 2.53  |
| $\text{Al}_4\text{Sb}$    | $\text{Al} + \text{Al}_3\text{Sb}$    | 1.94  | $\text{Al}_4\text{Sb}^-$    | $\text{Al} + \text{Al}_3\text{Sb}^-$    | 2.11  |
| $\text{Al}_5\text{Sb}$    | $\text{Al} + \text{Al}_4\text{Sb}$    | 3.01  | $\text{Al}_5\text{Sb}^-$    | $\text{Al} + \text{Al}_4\text{Sb}^-$    | 3.17  |
| $\text{Al}_6\text{Sb}$    | $\text{Al} + \text{Al}_5\text{Sb}$    | 2.39  | $\text{Al}_6\text{Sb}^-$    | $\text{Al} + \text{Al}_5\text{Sb}^-$    | 2.34  |
| $\text{Al}_7\text{Sb}$    | $\text{Al} + \text{Al}_6\text{Sb}$    | 2.51  | $\text{Al}_7\text{Sb}^-$    | $\text{Al} + \text{Al}_6\text{Sb}^-$    | 2.77  |
| $\text{Al}_8\text{Sb}$    | $\text{Al} + \text{Al}_7\text{Sb}$    | 2.92  | $\text{Al}_8\text{Sb}^-$    | $\text{Al} + \text{Al}_7\text{Sb}^-$    | 2.87  |
| $\text{Al}_9\text{Sb}$    | $\text{Al} + \text{Al}_8\text{Sb}$    | 2.80  | $\text{Al}_9\text{Sb}^-$    | $\text{Al} + \text{Al}_8\text{Sb}^-$    | 2.48  |
| $\text{Al}_{10}\text{Sb}$ | $\text{Al} + \text{Al}_9\text{Sb}$    | 2.31  | $\text{Al}_{10}\text{Sb}^-$ | $\text{Al} + \text{Al}_9\text{Sb}^-$    | 2.81  |
| $\text{Al}_{11}\text{Sb}$ | $\text{Al} + \text{Al}_{10}\text{Sb}$ | 2.91  | $\text{Al}_{11}\text{Sb}^-$ | $\text{Al} + \text{Al}_{10}\text{Sb}^-$ | 3.34  |
| $\text{Al}_{12}\text{Sb}$ | $\text{Al} + \text{Al}_{11}\text{Sb}$ | 3.40  | $\text{Al}_{12}\text{Sb}^-$ | $\text{Al} + \text{Al}_{11}\text{Sb}^-$ | 2.75  |
| $\text{Al}_{13}\text{Sb}$ | $\text{Al} + \text{Al}_{12}\text{Sb}$ | 2.71  | $\text{Al}_{13}\text{Sb}^-$ | $\text{Al}_{13}^- + \text{Sb}$          | 2.26  |
| $\text{Al}_{14}\text{Sb}$ | $\text{Al} + \text{Al}_{13}\text{Sb}$ | 3.09  | $\text{Al}_{14}\text{Sb}^-$ | $\text{Al} + \text{Al}_{13}\text{Sb}^-$ | 3.23  |
| $\text{Al}_{15}\text{Sb}$ | $\text{Al} + \text{Al}_{14}\text{Sb}$ | 2.69  | $\text{Al}_{15}\text{Sb}^-$ | $\text{Al} + \text{Al}_{14}\text{Sb}^-$ | 2.16  |
| $\text{Al}_{16}\text{Sb}$ | $\text{Al} + \text{Al}_{15}\text{Sb}$ | 1.85  | $\text{Al}_{16}\text{Sb}^-$ | $\text{Al} + \text{Al}_{15}\text{Sb}^-$ | 2.20  |

Table S8. The most possible dissociation channels and the corresponding dissociation energies (eV) of  $\text{Al}_{n+1}^q$  ( $q=0,-1$ ,  $n=1-16$ ) clusters.

| clusters         | DC                           | $E_D$ | clusters         | DC                           | $E_D$ |
|------------------|------------------------------|-------|------------------|------------------------------|-------|
| $\text{Al}_2$    | $\text{Al} + \text{Al}$      | 1.45  | $\text{Al}_2$    | $\text{Al} + \text{Al}$      | 2.49  |
| $\text{Al}_3$    | $\text{Al} + \text{Al}_2$    | 2.15  | $\text{Al}_3$    | $\text{Al} + \text{Al}_2$    | 2.37  |
| $\text{Al}_4$    | $\text{Al} + \text{Al}_3$    | 1.79  | $\text{Al}_4$    | $\text{Al} + \text{Al}_3$    | 2.45  |
| $\text{Al}_5$    | $\text{Al} + \text{Al}_4$    | 2.74  | $\text{Al}_5$    | $\text{Al} + \text{Al}_4$    | 2.46  |
| $\text{Al}_6$    | $\text{Al} + \text{Al}_5$    | 2.73  | $\text{Al}_6$    | $\text{Al} + \text{Al}_5$    | 3.12  |
| $\text{Al}_7$    | $\text{Al} + \text{Al}_6$    | 3.38  | $\text{Al}_7$    | $\text{Al} + \text{Al}_6$    | 2.98  |
| $\text{Al}_8$    | $\text{Al} + \text{Al}_7$    | 2.20  | $\text{Al}_8$    | $\text{Al} + \text{Al}_7$    | 2.35  |
| $\text{Al}_9$    | $\text{Al} + \text{Al}_8$    | 2.58  | $\text{Al}_9$    | $\text{Al} + \text{Al}_8$    | 2.94  |
| $\text{Al}_{10}$ | $\text{Al} + \text{Al}_9$    | 2.63  | $\text{Al}_{10}$ | $\text{Al} + \text{Al}_9$    | 2.62  |
| $\text{Al}_{11}$ | $\text{Al} + \text{Al}_{10}$ | 2.76  | $\text{Al}_{11}$ | $\text{Al} + \text{Al}_{10}$ | 2.84  |
| $\text{Al}_{12}$ | $\text{Al} + \text{Al}_{11}$ | 2.98  | $\text{Al}_{12}$ | $\text{Al} + \text{Al}_{11}$ | 2.82  |
| $\text{Al}_{13}$ | $\text{Al} + \text{Al}_{12}$ | 3.41  | $\text{Al}_{13}$ | $\text{Al} + \text{Al}_{12}$ | 4.28  |
| $\text{Al}_{14}$ | $\text{Al} + \text{Al}_{13}$ | 2.82  | $\text{Al}_{14}$ | $\text{Al} + \text{Al}_{13}$ | 1.94  |
| $\text{Al}_{15}$ | $\text{Al} + \text{Al}_{14}$ | 2.45  | $\text{Al}_{15}$ | $\text{Al} + \text{Al}_{14}$ | 2.70  |
| $\text{Al}_{16}$ | $\text{Al} + \text{Al}_{15}$ | 2.83  | $\text{Al}_{16}$ | $\text{Al} + \text{Al}_{15}$ | 2.69  |
| $\text{Al}_{17}$ | $\text{Al} + \text{Al}_{16}$ | 2.69  | $\text{Al}_{17}$ | $\text{Al} + \text{Al}_{16}$ | 2.77  |

Table S9. The natural charge (NC) of Sb atom, the local magnetic moments of the 5s and 5p states for Sb atom, 3s and 3p states for Al atom in the most stable structures of  $\text{Al}_n\text{Sb}^q$  ( $q=0,-1$ ,  $n=1-16$ ) clusters, together with the total magnetic moments.

| Size(n) | $\text{Al}_n\text{Sb}$ |                      |       |                      |      |             | $\text{Al}_n\text{Sb}$ |                      |       |                      |      |             |
|---------|------------------------|----------------------|-------|----------------------|------|-------------|------------------------|----------------------|-------|----------------------|------|-------------|
|         | Sb                     | $\text{Sb}(M/\mu_B)$ |       | $\text{Al}(M/\mu_B)$ |      | Tot.        | Sb                     | $\text{Sb}(M/\mu_B)$ |       | $\text{Al}(M/\mu_B)$ |      | Tot.        |
|         | NC(e)                  | 5s                   | 5p    | 3s                   | 3p   | ( $\mu_B$ ) | NC                     | 5s                   | 5p    | 3s                   | 3p   | ( $\mu_B$ ) |
| 1       | -0.34                  | 0.00                 | 1.46  | 0.15                 | 0.38 | 2.01        | -0.81                  | -0.01                | 0.48  | 0.14                 | 0.45 | 1.08        |
| 2       | -0.48                  | 0.00                 | 0.50  | 0.22                 | 0.30 | 1.00        | -1.13                  | 0.00                 | 0.00  | 0.00                 | 0.00 | 0.00        |
| 3       | -0.55                  | 0.00                 | 0.00  | 0.00                 | 0.00 | 0.00        | -0.58                  | 0.01                 | 0.09  | 0.05                 | 0.85 | 1.02        |
| 4       | -0.81                  | 0.01                 | -0.02 | 0.06                 | 0.92 | 0.93        | -0.50                  | 0.00                 | 0.00  | 0.00                 | 0.00 | 0.00        |
| 5       | -0.27                  | 0.00                 | 0.00  | 0.00                 | 0.00 | 0.00        | -0.29                  | -0.01                | 0.22  | 0.16                 | 0.66 | 1.03        |
| 6       | -0.09                  | 0.00                 | 0.21  | 0.18                 | 0.61 | 0.98        | -0.29                  | 0.00                 | 0.00  | 0.00                 | 0.00 | 0.00        |
| 7       | -0.06                  | 0.00                 | 0.00  | 0.00                 | 0.00 | 0.00        | -0.33                  | -0.01                | 0.20  | 0.28                 | 0.50 | 0.94        |
| 8       | -0.13                  | 0.01                 | -0.03 | 0.23                 | 0.82 | 1.04        | -0.28                  | 0.00                 | 0.00  | 0.00                 | 0.00 | 0.00        |
| 9       | -0.02                  | 0.00                 | 0.00  | 0.00                 | 0.00 | 0.00        | -0.21                  | 0.00                 | 0.03  | 0.19                 | 0.76 | 0.98        |
| 10      | -0.09                  | 0.01                 | -0.02 | 0.23                 | 0.76 | 0.95        | -0.16                  | 0.00                 | 0.00  | 0.00                 | 0.00 | 0.00        |
| 11      | 0.01                   | 0.00                 | 0.00  | 0.00                 | 0.00 | 0.00        | -0.13                  | 0.01                 | -0.04 | 0.29                 | 0.73 | 1.04        |
| 12      | 0.04                   | 0.00                 | 0.16  | 0.26                 | 0.62 | 1.10        | -0.11                  | 0.00                 | 0.00  | 0.00                 | 0.00 | 0.00        |
| 13      | 0.04                   | 0.00                 | 0.00  | 0.00                 | 0.00 | 0.00        | -0.12                  | 0.00                 | 0.26  | 0.24                 | 0.53 | 0.98        |
| 14      | 0.01                   | -0.01                | 0.20  | 0.33                 | 0.40 | 0.96        | -0.15                  | 0.00                 | 0.00  | 0.00                 | 0.00 | 0.00        |
| 15      | 0.02                   | 0.00                 | 0.00  | 0.00                 | 0.00 | 0.00        | -0.12                  | 0.00                 | 0.00  | 0.24                 | 0.70 | 0.94        |
| 16      | -0.09                  | 0.00                 | 0.05  | 0.17                 | 0.71 | 0.95        | -0.22                  | 0.00                 | 0.00  | 0.00                 | 0.00 | 0.00        |

## References:

- [1] J. J. Melko, P. A. Clayborne, C. E. Jones Jr., J. U. Reveles, U. Gupta, S. N. Khanna, and A. W. Castleman Jr., *J. Phys. Chem. A* **114**, 2045 (2010).
- [2] X. D. Xing, J. J. Wang, X. Y. Kuang, X. X. Xia, C. Lu, and G. Maroulis, *Phys. Chem. Chem. Phys.* **18**, 26177 (2016).
- [3] X. Li, H. B. Wu, X. B. Wang, L. S. Wang, *Phys. Rev. Lett.* **81**, 1909 (1998).
- [4] S. Paranthaman, K. Y. Hong, J. H. Kim, D. E. Kim, T. K. Kim, *J. Phys. Chem. A* **117**, 9293 (2013).
